# Supplementary material for: Prognostic implications of abnormalities of chromosome 13 and the presence of multiple cytogenetic high-risk abnormalities in newly diagnosed multiple myeloma
Source: PubMed Central journal article supplement (PMC5709752; doi:10.1038/bcj.2017.83), 2017-09-01

— 0 HRA    - - - 1 HRA    - - - 2 HRA    ····· 3 HRA

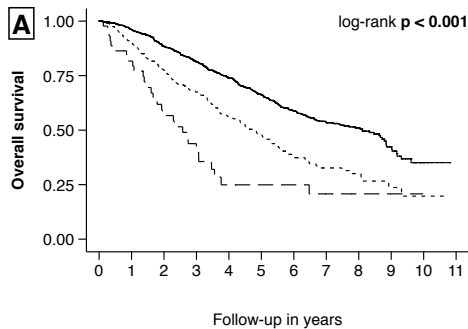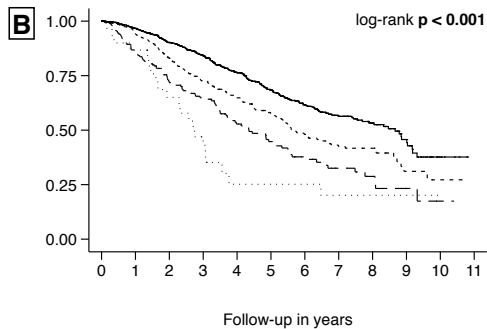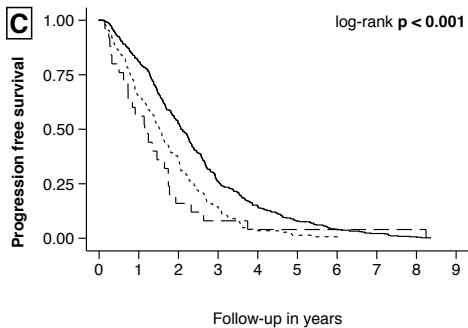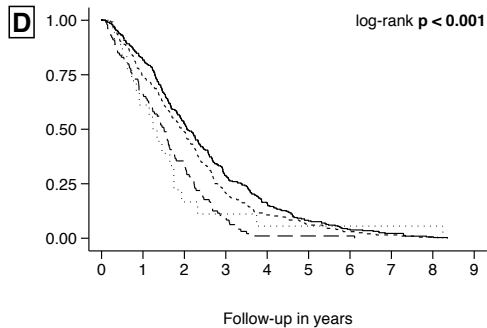

Supplement: bcj201783x2.pdf [file bcj201783x2.pdf]
